26 **ABSTRACT**

27 Decreased expression of the mitochondrial protein frataxin (FXN) causes Friedreich's ataxia  
28 (FRDA). FRDA is a neurodegenerative disease also characterized by systemic metabolic alterations  
29 that increase the risk of developing type 2 diabetes thus aggravating FRDA prognosis. Brown adipose  
30 tissue (BAT) is a mitochondria-enriched and anti-diabetic tissue that, in addition to its  
31 thermoregulatory role, turns excess energy into heat to maintain energy balance. Here we report that  
32 the FXN knock-in/knock-out (KIKO) mouse shows reduced energy expenditure and  $VO_2$ ,  
33 hyperlipidemia, decreased insulin sensitivity and enhanced circulating levels of leptin, recapitulating  
34 diabetes-like signatures. FXN deficiency leads to alteration of mitochondrial structure and oxygen  
35 consumption, decreased lipolysis and lipid accumulation in BAT. Transcriptomic data highlighted a  
36 blunted thermogenesis response, as several biological processes related to thermogenesis (e.g.  
37 response to temperature stimuli, mitochondrial gene transcription, triglyceride metabolism,  
38 adipogenesis) resulted affected in BAT of KIKO mice upon cold exposure. Decreased adaptation to  
39 cool temperature in association with limited PKA-mediated lipolysis and downregulation of the  
40 expression of the genes controlling mitochondrial metabolism and lipid catabolism were observed in  
41 KIKO mice. T37i brown adipocytes and primary adipocytes with FXN deficiency showed reduced  
42 thermogenesis and adipogenesis markers respectively recapitulating the molecular signatures  
43 detected in KIKO mice.

44 Collectively our data point to BAT dysfunction in FRDA and suggest BAT as a promising target to  
45 overcome metabolic complications in FRDA.

46

## 47 **INTRODUCTION**

48 Friedreich's Ataxia (FRDA) is an inherited autosomal recessive neurodegenerative disorder. It is  
49 caused by mutation in the gene encoding mitochondrial protein frataxin (FXN) (Abraham et al., 2015).  
50 The primary function of FXN is to direct the mitochondrial synthesis of iron-sulfur clusters (Fe/S),  
51 which are essential parts of several mitochondrial enzymes, including mitochondrial respiratory chain  
52 complexes and aconitase (Maio and Rouault, 2015).

53 Deficiency in mitochondrial respiration, mitochondrial iron accumulation and oxidative stress are  
54 claimed as the main pathogenic factors in FRDA. Mitochondrial dysfunction mostly affects heart  
55 (Koeppen et al., 2015) and cerebellum at the level of dentate nucleus (Koeppen et al., 2011;Koeppen  
56 and Mazurkiewicz, 2013).

57 FRDA is characterized by a variable phenotype. Besides neurological symptoms, cardiomyopathy  
58 (Koeppen et al., 2015) and systemic metabolic alterations occur (Cnop et al., 2013), which can  
59 predispose to diabetes development and cause premature death. In particular, patients with FRDA  
60 experience a greater risk of abnormal glucose homeostasis, in the form of both insulin resistance and  
61 glucose intolerance (Isaacs et al., 2016). Increased blood cholesterol and triglycerides levels have  
62 been observed in FRDA patients (Raman et al., 2011;Tamarit et al., 2016). To date, the major cause  
63 of diabetes mellitus occurrence in FRDA patients seems to be related to impairment of mitochondria  
64 that in pancreatic  $\beta$ -cell are fundamental in generating signals that trigger and amplify insulin  
65 secretion (Cnop et al., 2012).

66 Brown adipose tissue (BAT) is a high oxidative tissue extremely rich in mitochondria that highly  
67 expresses the thermogenic protein uncoupling protein 1 (UCP1). BAT has emerged as a key regulator  
68 of glucose, lipid and insulin metabolism (Chondronikola et al., 2014;Chondronikola et al.,  
69 2016;Hankir and Klingenspor, 2018). Actually, BAT activity requires the uptake of substrates from  
70 the circulation, mostly free fatty acids (FAs), but also glucose, successfully leading to hypolipidemic  
71 and hypoglycemic effects which can significantly improve insulin sensitivity and exert a protective  
72 role in the pathogenesis of type 2 diabetes (Sidossis and Kajimura, 2015). FAs liberated from

73 intracellular TGs through the action of lipases are also critical for BAT thermogenesis (Blondin et  
74 al., 2017). Interestingly, abnormal accumulation of intracellular lipids has been observed in patients'  
75 cells as well as in animal models (Puccio et al., 2001;Coppola et al., 2009;Tamarit et al., 2016;Stram  
76 et al., 2017), pointing to a possible inefficient lipolysis.

77 Importantly, it has been discovered that decreased activity of BAT is associated with insulin  
78 resistance and diabetes (Flachs et al., 2013;Sacks and Symonds, 2013). Despite this potential clinical  
79 importance, the regulation of BAT in FDRA patients is not well-investigated.

80 In this work we show that FXN deficiency significantly affects lipolytic and thermogenic pathways  
81 as well as thermogenic adipocyte differentiation suggesting that BAT impairment could be at center  
82 stage of type 2 diabetes development in FRDA patients.

83

84

## 85 **RESULTS**

### 86 *Alteration of basal metabolic parameters in KIKO mice*

87 Herein, we used KIKO mouse that represents a suitable *in vivo* model for studying neurodegeneration  
88 as well as metabolic complications in FRDA (Coppola et al., 2009;McMackin et al., 2017). We firstly  
89 monitored body weight and a trend to gain weight was observed in 6-months KIKO mice that  
90 becomes significant at 8 months of age (**Fig. 1A**). In contrast, food and water intake were never found  
91 changed (**data not shown**). We have performed bio-clinical analyses and, among the tested  
92 parameters, a significant increase of triglycerides and cholesterol levels was detected in KIKO mice  
93 both at 6- and 8-months of age (**Fig. 1B**). Other metabolic parameters such as fasting glycaemia (**Fig.**  
94 **1B**) as well as markers of general organ functions (total plasma proteins), including kidney  
95 (creatinine, urea) and liver (albumin) resulted unaltered (**data not shown**), suggesting that  
96 hyperlipidemia represents an early event in FRDA. Even though fasting glycaemia appeared  
97 unaffected, oral glucose tolerance test (OGTT) carried out in 8 months old KIKO mice revealed that  
98 glycaemia remained higher than WT mice at 120 min from glucose administration (**Fig 1C**).

99 The circulating levels of adipose tissue-secreted cytokines, i.e. adipokines, nicely reflect body  
100 metabolic state and are considered valid markers to monitor insulin resistance (Li et al., 2013;Adams-  
101 Huet et al., 2014). Through Luminex® Multiplex Assay, we found that KIKO mice underwent a  
102 prominent raise of plasma leptin levels at 8 months of age (**Fig. 1D**), while other adipokines such as  
103 adiponectin and FGF21 remained unchanged (**Fig. 1E and 1F**). The increase in leptin, and more  
104 specifically the leptin to adiponectin ratio (LAR), is considered a useful tool to evaluate insulin  
105 resistance (Finucane et al., 2009). Accordingly, 8 months-old KIKO mice showed increased LAR  
106 compared to WT mice (**Fig. 1G**). We have then characterized metabolic profile of KIKO mice by  
107 performing indirect calorimetry. Before measurements, all mice were acclimatized for 48 h into  
108 individual metabolic chambers at 25 °C, with free access to food (standard diet) and water. The  
109 respiratory exchange ratio (RER), which is expressed as  $VCO_2/VO_2$ , was similar in WT and KIKO  
110 mice and around 1.0 indicating carbohydrates as the predominant fuel source (**data not shown**).

111 At 6 months, the recorded oxygen consumption ( $VO_2$ ) was lower in KIKO than WT mice, with KIKO  
112 mice showing a further decrease of  $VO_2$  at 8 months (**Fig. 2A**). Moreover, KIKO mice showed a  
113 decrease of resting energy expenditure (REE) at 6 months of age (**Fig. 2B**). This parameter was  
114 altered at higher extent at 8 months of age pointing to a progressive dysfunction in basal BAT  
115 thermogenic capacity (**Fig. 2B**).

116

### 117 *KIKO mice show altered mitochondrial function and lipid accumulation in BAT*

118 BAT activity strongly depends on mitochondrial lipid oxidation to produce heat (Hankir and  
119 Klingenspor, 2018). As dysfunctional FXN affects mitochondrial oxidative capacity, we supposed  
120 that BAT oxidative metabolism could be altered. This prompted us at firstly analyzing BAT  
121 mitochondria at ultrastructural level through transmission electron microscopy. In WT mice typical  
122 mitochondria (abundant, large, and rich in cristae) were present in BAT, while in KIKO mice the  
123 mitochondria appeared lower in number and enlarged with disorganized and thickened cristae (**Fig.**  
124 **3A**). We then compared the basal oxygen consumption in mitochondria isolated from BAT and as  
125 expected the oxygen consumption was lower in KIKO than WT mice (**Fig. 3B**).

126 Accumulation of lipid droplets (LDs) and an increased lipogenesis have been previously described in  
127 fibroblasts of FRDA patients and cardiomyocytes from KIKO mice (Coppola et al., 2009). In line  
128 with these data, we found that BAT of KIKO mice has higher lipid droplets dimension with respect  
129 to WT mice (**Fig. 3C**). We have tested whether this event was dependent on defective lipolysis that  
130 importantly contributes to LDs turnover. BAT lipolysis strongly relies on cAMP-dependent protein  
131 kinase A (PKA) that coordinates lipolytic machinery activation through hormone/phospho-dependent  
132 mechanisms. To this end, we evaluated the level of the PKA phosphorylated substrates as well as the  
133 lipases directly responsible for LDs degradation. As reported in the immunoblot in **Fig. 3D**, PKA  
134 substrates were reduced in their phosphorylated levels, suggesting a general inhibition of PKA  
135 activity. Among the PKA substrates the hormone-sensitive lipase (HSL) is included, as it is activated  
136 via the phosphorylation of Ser660. While the basal levels of HSL remained unaltered, the phospho-

137 active levels of HSL were lower in KIKO compared to WT mice (**Fig. 3D, E**). The levels of  
138 phosphorylation at Ser565 (phospho-inactive form) were instead increased, indicating an impaired  
139 basal HSL activity. According to what reported in other studies on mouse model and patients (Shan  
140 et al., 2013; Sahdeo et al., 2014), we also found a significant decrease of the transcription factor Nrf2  
141 (**Fig. 3D, E**) that, besides being an up-stream modulator of the expression of antioxidant genes and  
142 protecting against oxidative stress, positively regulates enzymes involved in mitochondrial fatty acids  
143 oxidation (Esteras et al., 2016).

144

#### 145 *KIKO mice display affected expression of genes related to lipid utilization and thermogenesis*

146 Considering the alteration of mitochondrial respiration and lipid catabolism observed in BAT, we  
147 hypothesized a compromised thermoregulatory activity in KIKO mice. To test this, we next exposed  
148 mice to cool temperature (4°C) for 12 h and a lower body temperature was measured in KIKO mice  
149 both at thermoneutrality as well at 4°C (**Fig. 4A**). Remarkably, BAT of cold-exposed mice showed a  
150 that KIKO mice maintained a higher LD size with respect to WT mice (**Fig. 4B**). In particular, the  
151 measurement of LD size at RT confirmed their higher dimension in KIKO mice compared to WT  
152 mice (**Fig. 4C**). Cold exposure promoted a marked reduction of LDs diameter both in WT and KIKO  
153 mice; however, in cold-exposed KIKO mice LDs were larger than WT mice (**Fig. 4C**).

154 To more deeply decipher the cause(s) of cold intolerance, we performed BAT transcriptome profiling  
155 using an ultra-deep unbiased RNA sequencing (RNA-seq) approach. The RNA samples analyzed  
156 were prepared from BAT of WT and KIKO mice maintained at RT or exposed to cold for 12 hrs. A  
157 summary of the results obtained through RNAseq is reported in the volcano plots depicted in **Fig.**  
158 **5A**. Through pair-wise differential gene expression, we found that about 200 genes were up-regulated  
159 ( $\text{Log}_2\text{FC} > 0.58$ ;  $p < 0.05$ ) upon cold exposure both in WT and KIKO mice. In order to determine which  
160 biological processes or pathways were overexpressed, the list of up-regulated genes was used as the  
161 input for a functional enrichment analysis. By using the plugin ClueGo in the Cytoscape 3.7.1  
162 platform, as expected we found that the response to temperature stimulus was the biological processes

163 significantly up-regulated either in WT or KIKO mice exposed to cold with respect to their controls,  
164 even though KIKO mice showed a lower enrichment with respect to WT mice (**Fig. 5B**). The  
165 biological processes found overrepresented in WT mice were positive regulation of cold induced  
166 thermogenesis, triglyceride metabolic process (including lipolytic genes), monocarboxylic acid  
167 transport (including fatty acid transporters) and mitochondrial gene expression (**Fig. 5B, left panel**),  
168 in line with the notion that fatty acids transport and degradation, and expression of mitochondrial  
169 proteins accompany thermogenesis. Interestingly, genes mapping to categories pertaining purine  
170 nucleotide and monocarboxylic acid biosynthetic processes (including fatty acids biosynthesis genes)  
171 were found overexpressed in KIKO mice exposed to cold compared to KIKO mice at RT (**Fig. 5B,**  
172 **right panel**). Moreover, in cold-exposed KIKO mice we found an enrichment of reactive oxygen  
173 species (ROS) biosynthetic process and cellular response to xenobiotic stimulus (**Fig. 5B, right**  
174 **panel**).

175 The analysis of KEGG and Wiki pathways showed that genes belonging to PPAR signaling, notably  
176 induced during thermogenesis, were significantly overrepresented both in cold-exposed WT and  
177 KIKO mice; however, the number of genes found in this pathway was lower in KIKO than WT mice  
178 (**Fig. 5C**). The same trend was observed for p53 signaling pathway. Among the top enriched  
179 pathways, WT mice also had adipogenesis, peroxisome and beta-oxidation (**Fig. 5C, left panel**); by  
180 contrast, RNA degradation, biosynthesis of fatty acids and ferroptosis were among the enriched  
181 pathways found in BAT of cold-exposed KIKO mice (**Fig. 5C, right panel**). Ferroptosis is a more  
182 recently recognized cell death caused by iron overload (Dixon et al., 2012; Stockwell et al., 2017),  
183 suggesting that in KIKO mice the thermogenic response of BAT is blunted and likely accompanied  
184 by iron/ROS-induced cell death.

185 To complement our analysis, we alternatively examined transcriptomic data through Funrich v3.0  
186 and found that the response to cold was the biological process significantly and similarly enriched in  
187 WT and KIKO mice upon cold exposure (**Fig. 5D**). Brown fat cell differentiation and other biological  
188 processes related to in lipid metabolism were found overrepresented both in WT and KIKO mice.



189 However, in KIKO mice a lower percentage of genes pertaining to these processes was found  
190 compared to WT mice (**Fig. 5D**). In **Fig. 5E**, a heatmap including some representative genes strictly  
191 involved in adipocyte differentiation, heat production and thermogenic-related metabolic re-  
192 adaptation is illustrated. The heatmap shows that KIKO mice undergo a lower up-regulation of these  
193 genes compared to WT mice, arguing that cold intolerance of KIKO mice could be ascribed to  
194 defective activation of adipocytes differentiation, thermogenic pathway, impaired BAT lipid  
195 catabolism and/or oxidative capacity.

196 Transcriptomic results were confirmed by performing qPCR analyses. In particular, we confirmed  
197 the downregulation of FXN mRNA in KIKO mice and found a significant downregulation of the  
198 expression of other mitochondrial genes such as Tfam, Mtco1, Nd1, Atp6 and Nd4 (**Fig. 6A**). Upon  
199 cold exposure, WT mice showed up-regulation of Ucp1, Tfam, Nd1 and Atp6. In KIKO mice an  
200 increase of Ucp1, Tfam, Nd1 and Atp6 was also achieved; however, the level of upregulation was  
201 lower than WT mice.

202 We also confirmed the alterations in the expression level of genes related to lipid metabolism and  
203 thermogenesis in KIKO mice. Actually, as showed in **Fig. 6B**, the expression of genes implicated in  
204 fatty acids transport (i.e. Cd36, Fabp4, Cpt1b) and thermogenesis (i.e. Dio2) resulted downregulated  
205 in KIKO mice. A slight but significant decrease of the lipase responsible for the first step of  
206 triglyceride lipolysis Atgl and its enhancer Abdh5 was also found, indicating an alteration of the  
207 triglyceride catabolism and lipid signaling. Upon cold exposure, overall these genes resulted up-  
208 regulated both in WT and KIKO mice; however, in KIKO mice Cd36, Abdh5, Fabp4, Cpt1b and  
209 Dio2 resulted up-regulated at minor extent (**Fig. 6B**).

210 Through immunohistochemical analyses we confirmed the alteration of PKA lipolytic pathway in  
211 BAT of KIKO mice. Indeed, a decrease of PKA kinase activity was occurring already at RT and a  
212 further reduction of phospho-PKA substrates was found at 4°C with respect to WT mice (**Fig. 6C**).  
213 In particular, at RT the BAT of WT mice shows brown adipocytes with a diffused and stronger  
214 staining with respect to BAT of KIKO mice. Upon cold exposure, the immunostaining of phospho-

215 PKA substrates was predominantly nuclear, in line with the notion that PKA can migrate into the  
216 nucleus during thermogenesis (Rim et al., 2004) and phosphorylate a number of transcriptional  
217 regulators (e.g. Ppargc1a) and transcription factors triggering adipogenesis and thermogenesis as well  
218 as mitochondrial oxidative activity and biogenesis (e.g. CREB) (Cannon and Nedergaard,  
219 2004;Baldelli et al., 2014). Notably, the nuclear staining of phospho-PKA substrates was markedly  
220 reduced in BAT of cold-exposed KIKO mice (**Fig. 6C**). Moreover, in these mice we found an increase  
221 of LD-associated protein perilipin-1 (**Fig. 6D**), which is an inhibitor of triglyceride degradation by  
222 HSL (Grahn et al., 2013), thus highlighting the dysfunction of lipolysis in BAT of KIKO mice.

223

#### 224 *FXN deficiency leads to impaired thermogenesis and adipogenesis in cultured adipocytes*

225 To confirm that FXN deficiency affects lipid utilization and thermogenesis, we moved to an *in vitro*  
226 system. In cultured T37i brown adipocytes, we downregulated FXN levels through RNA interference  
227 by transfecting a pool of siRNA against FXN mRNA (FXN-). Transfection of T37i cells with a pool  
228 of scramble siRNAs were used as control (Scr). To induce thermogenic cascade, T37i were treated  
229 with isobutyl methylxanthine (IBMX), a nonspecific inhibitor of phosphodiesterase (PDE), which  
230 enhances the intracellular cAMP levels, inducing a constitutive activation of PKA. As reported in  
231 **Fig. 7A**, the analysis of LDs evidenced that lipolysis was likely blunted as consequence of FXN  
232 deficiency as LDs dimension was larger in FXN- cells than Scr cells both in untreated and IBMX-  
233 treated cells. **Fig. 7B** shows that FXN downregulation did lead to the inhibition of lipolysis, as  
234 reduced levels of phospho-active HSL (p-HSL660), a known target of PKA activity, was elicited both  
235 upon basal condition and IBMX treatment. In line with the transcriptomic data obtained in BAT of  
236 KIKO mice, PPAR $\gamma$ , a thermogenic transcription factor regulating mitochondrial biogenesis and lipid  
237 catabolism, was reduced in FXN- cells under resting conditions and, in contrast to Scr cells, it  
238 remained down-regulated upon IBMX treatment (**Fig. 7C**). Importantly, UCP1 protein was  
239 efficiently induced by IBMX in Scr cells but not in FXN- cells. Mitochondrial proteins including  
240 VDAC and TOM20 were also reduced in FXN- cells both prior and after IBMX treatment (**Fig. 7C**).

241 RT-qPCR analyses confirmed the impairment of thermogenic program, as the mRNA expression of  
242 thermogenic markers including *Cox7a*, *Ppargc1a*, *Cidea* and *Cd36* were significantly reduced in  
243 FXN- cells both under basal condition and upon IBMX treatment with respect to Scr cells (**Fig. 7D**).  
244 In line with these data, reduced oxygen consumption was also recorded in FXN- cells (**Fig. 7E**). Since  
245 RNAseq analyses pointed to a defective induction of adipogenic genes upon cold exposure, we then  
246 attempted at evaluating whether adipocyte differentiation potential could be impaired in KIKO mice.  
247 We hence isolated stromal vascular cells (SVCs) from subcutaneous adipose tissue, which is highly  
248 enriched with primary adipocyte precursors. Upon certain circumstances (i.e. rosiglitazone  
249 treatment), SVCs may differentiate in brown-like adipocytes displaying high mitochondrial mass and  
250 expressing detectable levels of *Ucp1* (Aune et al., 2013). As reported in **Fig. 8A**, WT SVCs were  
251 efficiently differentiated in adipocytes as a great number of cells show adipocyte morphology with  
252 an evident accumulation of LDs. On the contrary, SVCs from KIKO mice show affected adipogenic  
253 capacity as a lower number of adipocytes was obtained. As expected, RT-qPCR analyses evidenced  
254 a marked reduction of FXN mRNA levels in KIKO with respect to WT adipocytes that was  
255 accompanied by a significant down-regulation of genes related to adipogenesis, thermogenesis and  
256 mitochondrial biogenesis including *Ppar $\gamma$* , *Ppargc1a*, *Ucp1*, *Cd36* and *Mtco1* (**Fig. 8B**).  
257  
258

## 259 **DISCUSSION**

260 Abnormal glycemic control, increased cholesterol and triglycerides levels as well as type 2 diabetes  
261 are more frequent in FRDA patients than in the general population and concur in the severity of  
262 FRDA (extensively reviewed in (Tamarit et al., 2016)). In this work we demonstrated KIKO mice  
263 show several diabetes-related hallmarks, including hyperlipidaemia, altered tolerance to glucose, and  
264 elevated circulating level of leptin, a peptide hormone secreted by adipose tissue whose increase is  
265 strictly related to insulin resistance and low-grade inflammatory states (Francisco et al., 2018).

266 Overall these metabolic changes make this model suitable to decipher the events contributing to  
267 disease severity and find novel druggable target to overcome type 2 diabetes development in FRDA  
268 patients.

269 In the last decade, the scientific community has put a spotlight on BAT as a crucial player in the  
270 control of energy metabolism, being the main glucose and lipid clearance organ with the highest  
271 mitochondrial fatty oxidation rate (Doh et al., 2005; Bartelt et al., 2011). We have reported that BAT  
272 mitochondria of KIKO mice show a significant ultrastructural alteration, lower abundance and  
273 oxygen consumption and decreased mRNA expression of electron transport chain complex subunits  
274 compared to WT mice. Upon cold exposure KIKO mice show affected adaption to cold with an  
275 overall less efficient up-regulation of canonical thermogenesis-related genes and pathways including  
276 mitochondrial and lipid metabolism genes and PPAR signaling pathway.

277 It has been reported that FRDA patients show LDs accumulation in fibroblasts (Coppola et al., 2009).  
278 LDs accumulation was observed also in FXN deficient cultured cardiomyocytes (Obis et al., 2014)  
279 and heart of FRDA mouse models (Puccio et al., 2001; Stram et al., 2017). Hepatic steatosis in mice  
280 with a liver-specific FXN ablation (Martelli et al., 2012) and altered lipid metabolism associated with  
281 increased LDs in glial cells of the drosophila FRDA model (Navarro et al., 2010) were also observed.  
282 Down-regulation of PPAR $\gamma$ /PGC-1 $\alpha$  pathway and up-regulation of lipogenic genes have been  
283 previously proposed among the mechanisms leading to LDs accumulation (Sutak et al., 2008; Coppola  
284 et al., 2009). We have evidenced that FXN deficiency leads to LDs accumulation in BAT as well.

285 Notably, the size of LDs is the result of the balance between lipid demolition and deposition. Since  
286 BAT requires plentiful FAs, which are its primary substrate, lipolysis is activated during BAT  
287 thermogenesis (Cannon and Nedergaard, 2004;Nedergaard et al., 2011;Townsend and Tseng, 2014).  
288 We have demonstrated that impaired lipid degradation could contribute to LDs accumulation, as  
289 PKA-dependent lipolysis resulted significantly affected both under resting condition and upon cold  
290 exposure. As consequence, a significant reduction of the active form of HSL and increase of the LD-  
291 associated inhibitor of lipolysis perilipin was observed in BAT of KIKO mice.

292 Importantly, besides acting as fuels to sustain the electron transport chain flow, fatty acids are  
293 involved in the regulation of UCP1, or directly activate UCP1-mediated energy dissipation and heat  
294 production (Cannon and Nedergaard, 2004). The impaired lipid degradation observed in KIKO mice  
295 likely limits the funneling of fatty acids into mitochondria with consequent affected capacity to  
296 produce heat. Accordingly, fatty acids beta-oxidation was not disclosed among the enriched pathways  
297 in BAT of cold-exposed KIKO mice and a diminished expression of the mitochondrial fatty acid  
298 carrier Cpt1b was found. Notably, intracellular purine nucleotides exert an inhibitory action on UCP1  
299 protein (Fromme et al., 2018). It was recently demonstrated that upon thermogenic stimuli, brown  
300 adipocyte expression of enzymes implicated in purine metabolic remodeling is altered (Fromme et  
301 al., 2018). In particular, an overexpression of genes implicated in purine nucleotide degradation was  
302 found that was associated with a down-regulation of genes involved in purine nucleotide synthesis.  
303 In BAT of KIKO mice exposed to cold we found an overrepresentation of genes pertaining purine  
304 nucleotide biosynthetic process. Therefore, these data collectively indicate that UCP1, in addition to  
305 being up-regulated at lesser extent than WT mice, is less efficient in impinging heat production.

306 To exclude that the alterations found in BAT of KIKO mice could be the results of systemic adaptive  
307 responses to FXN deficiency, we validated our findings in cultured brown adipocytes downregulating  
308 FXN. By igniting thermogenic program via the PKA agonist IBMX we confirmed that FXN  
309 deficiency leads to the inhibition of lipolysis and affected up-regulation of genes related to the  
310 thermogenic cascade.

311 Another process having a critical role in maintaining thermogenic efficiency of BAT is the  
312 differentiation of resident brown fat adipocytes *de novo* that assures BAT regeneration and avoids its  
313 loss (Birerdinc et al., 2013). Transcriptomic data evidenced brown fat cell differentiation and  
314 adipogenesis as biological process and pathway affected upon cold exposure in BAT of our mouse  
315 model. We confirmed such hypothesis by analyzing the adipogenic potential of stromal vascular cells  
316 isolated from mouse adipose depots that resulted unable to fully differentiate in thermogenic  
317 adipocytes in KIKO mice.

318 It is important to notice that a less proficient up-regulation of p53 signaling pathway in KIKO mice  
319 was observed in BAT upon cold exposure. p53 is a stress responsive transcription factor that was  
320 reported to exert a positive regulatory effect on brown adipocyte differentiation (Al-Massadi et al.,  
321 2016) and BAT thermogenesis (Molchadsky et al., 2013). This evidence corroborates our idea that  
322 BAT dysfunction could at least in part depend on altered capacity of FXN deficient adipocyte  
323 precursors to efficiently differentiate and express mitochondrial and thermogenic genes.

324 Even though not still adequately investigated in the present work, upon cold stress condition the  
325 KEGG pathway of ferroptosis was significantly up-regulated in KIKO mice along with genes related  
326 to ROS metabolism. This is not surprising as we found a decrease of the Nrf2 protein, and oxidative  
327 stress, iron overload and ferroptosis have been claimed among the main pathogenic factors in FRDA  
328 (Shan et al., 2013; Petrillo et al., 2017; Abeti et al., 2018; Cotticelli et al., 2019). Interestingly, Nrf2,  
329 besides being an up-stream modulator of the expression of antioxidant genes and protection against  
330 oxidative stress/ferroptosis (Faraonio et al., 2006; Dodson et al., 2019), positively regulates enzymes  
331 involved in mitochondrial fatty acids oxidation (Esteras et al., 2016) and adipogenesis (Pi et al.,  
332 2010; Hou et al., 2012). Based on this, Nrf2 inducers, already proposed as FRDA therapeutics (Petrillo  
333 et al., 2017; Abeti et al., 2018) could be also advantageous for preserving BAT integrity and mitigating  
334 metabolic disturbances of FRDA patients via a BAT-dependent manner. Accordingly, Nrf2 targeting  
335 has been proposed as promising for treating type 2 diabetes (David et al., 2017).

336 BAT studies carried out in human fetuses and infants indicate that the tissue is widely distributed  
337 during these developmental stages and that the thermogenic capacity of BAT develops with  
338 gestational age reaching its maximum in infancy and early childhood when the demands for  
339 thermogenesis can be expected to be especially high (Lidell, 2019). Several studies suggest that BAT  
340 dysfunction during gestation and early childhood negatively influences metabolic health predisposing  
341 to type 2 diabetes development later in life (Liang et al., 2016;Entringer et al., 2017;Lettieri-Barbato  
342 et al., 2017). Therefore, it is possible to postulate that FRDA patients would have experienced BAT  
343 dysfunction early in life leading to disruption of systemic metabolic homeostasis.

344 In conclusion, by deeply characterizing KIKO mice at metabolic level we have provided multiple  
345 lines of evidence that FXN deficiency in mice leads to clinical-pathological features parallel to those  
346 observed in diabetic patients. Among the metabolic parameters we have evidenced that the lipolytic  
347 and thermogenic activities of BAT are reduced, thus providing the possibilities of targeting BAT that  
348 might result in therapeutic benefits in FRDA.

349

350

351

352

353

354

## 355 **MATERIALS AND METHODS**

### 356 **Animals**

357 Mouse experimentation was conducted in accordance with accepted standard of humane animal care  
358 after the approval by relevant local (Institutional Animal Care and Use Committee, Tor Vergata  
359 University) and national (Ministry of Health, license n°324/2018-PR) committees. Unless otherwise  
360 stated, mice were maintained at  $21.0 \pm ^\circ\text{C}$  and  $55.0 \pm 5.0\%$  relative humidity under a 12 h/12 h  
361 light/dark cycle (lights on at 6:00 AM, lights off at 6:00 PM). Food and water were given *ad libitum*.  
362 Experiments were carried out according to institutional safety procedures.

363 Knock-in knock-out (KIKO) mice were purchased from Jackson Laboratories (#012329). Littermate  
364 C57BL/6 mice (WT) were used as controls. Researchers were blinded to genotypes at the time of  
365 testing. Only WT and KIKO male mice were used and divided in the following groups: 1) 6 months-  
366 old WT and KIKO mice (n=12 each group); 2) 8 months-old WT and KIKO mice (n=12 each group);  
367 For cold exposure experiments additional male WT and KIKO at 6-months of age were divided in  
368 the following groups: 1) WT and KIKO mice maintained at room temperature (n=6 each group); 2)  
369 WT and KIKO mice maintained at  $4^\circ\text{C}$  for 12 h (n=6 each group). Rectal temperature was measured  
370 by high precision ( $\pm 0.1 ^\circ\text{C}$ ) rectal probe for mice (RET-3, ThermoWorks, Alpine, UT, USA).

371

### 372 **Bio-clinical and adipokine analyses**

373 Prior to bio-clinical analyses, mice were starved for 2 h. After blood collection, bio-clinical analyses  
374 were performed by colorimetric methods. In particular, glucose, cholesterol, triglycerides, creatinine,  
375 total plasma proteins, albumin and urea were measured through the automatized KeyLab analyzer  
376 (BPCBioSed, Italy) using specific assay kits (BPCBioSed).

377 Serum adiponectin, FGF21 and leptin levels were measured through a Mouse Magnetic Luminex  
378 Screening Assay (R&D System, Minneapolis, MN, USA).

379 For the glucose tolerance test (OGTT), mice were subjected to fasting for 12 h, followed by oral  
380 gavage with 2 g of dextrose/kg body mass. At the indicated time points, blood was collected from the



381 tail vein and glycaemia measured using a glucometer (Bayer Countur XT, Bayer Leverkusen,  
382 Germany).

383

### 384 **Indirect calorimetry**

385 Indirect calorimetry performed using LabMaster (TSE Systems, Bad Homburg, Germany) as  
386 previously described (Lettieri-Barbato et al., 2018). Oxygen consumption (VO<sub>2</sub>), carbon dioxide  
387 production (VCO<sub>2</sub>) and Resting energy expenditure (REE) were recorded every 15 min for 24h, and  
388 the data were averaged for each mouse.

389

### 390 **Histochemical analysis**

391 Formalin-fixed paraffin-embedded (BAT explants were cut in 3 µm sections and stained with  
392 hematoxylin and eosin (H&E) prior microscope analysis. Lipid droplet diameters were measured in  
393 three fields (300 droplets total at least) with ImageJ. For correlative purpose, an average score was  
394 derived for each sample. Perilipin and phospho-PKA substrate levels were investigated by  
395 immunohistochemistry on tissue sections. After antigen retrieval with Citrate Buffer (pH 6.0),  
396 sections were incubated at room temperature with the following primary antibodies: rabbit polyclonal  
397 antibody anti-Perilipin diluted 1:1000 (9349T, Cell Signalling Technology) and rabbit polyclonal  
398 antibody anti-phospho-PKA substrates diluted 1:100 (9621S, Cell Signalling Technology). Negative  
399 controls were obtained by omitting primary antibodies. Immunohistochemical reactions were  
400 visualized by DAB as the chromogen from MACH 1 Universal HRP-Polymer Detection (Biocare  
401 Medical, Concord, MA, USA).

402

### 403 **Ultrastructural Analysis**

404 BAT samples from animal models were fixed in 2.5% glutaraldehyde in 0.1 M cacodylate buffer for  
405 the morphological study. After fixation, dehydration and impregnation, samples were included in  
406 epoxy resins and acrylic, cut at the ultramicrotome and processed for the ultrastructural study of

407 brown adipocytes by electron microscopy. In particular, morphological aspects of the mitochondria,  
408 such as the presence and density of cristae, were evaluated. Ultrastructural images were collected  
409 with a Transmission Electron Microscope FEI Tecnai™ (Hillsboro, Oregon, USA), equipped with  
410 a dedicated Imaging Software System.

411

#### 412 **Cell and mitochondria oxygen consumption**

413 T37i cell line was gently provided by Prof. Marc Lombes (Inserm U693, Paris, France), cultured and  
414 differentiated as described by Nakae et al., 2008 (Nakae et al., 2008). Differentiated T37i brown  
415 adipocytes were transfected with a pool of 3 target-specific siRNAs against FXN mRNA FXN or  
416 scramble siRNAs (Santa Cruz Biotechnology, Dallas, TX, USA) by using DeliverX Plus kit  
417 (Affymetrix, Santa Clara, CA, USA). Treatment with isobutyl methyl xanthine (IBMX) was carried  
418 out at concentration of 0.5 mM for 4 h. For lipid droplet detection, cells were stained with Nile Red  
419 (0.25 µg/ml, 10 min). Staining with Hoechst 33342 (1 µg/ml, 10 min) was used to counterstain nuclei.  
420 Images were visualized by Nikon Eclipse TE200 epifluorescence microscope (Nikon, Florence, Italy)  
421 connected to a CCD camera. Images were captured under constant exposure time, gain and offset.  
422 Stromal vascular cells (SVCs) were isolated from subcutaneous adipose tissue and differentiated in  
423 brown-like adipocytes according to Aune et al (Aune et al., 2013). Oil Red O was used to detect  
424 intracellular triglycerides content as previously described (Lettieri-Barbato et al., 2018).  
425 Oxygen consumption was determined in cells and crude mitochondria and by using the Oxygraph  
426 Plus oxygen electrode system (Hansatech Instruments Ltd., Norfolk, UK). Intact cells were  
427 resuspended ( $1 \times 10^6$ /ml) in culture medium without FBS. Crude mitochondria were isolated from  
428 BAT as previously described (Lettieri Barbato et al., 2015) and resuspended in an appropriate  
429 mitochondrial activity buffer (70 mM sucrose, 220 mM mannitol, 2 mM HEPES buffer, 5 mM  
430 magnesium chloride, 5 mM potassium phosphate, 1 mM EDTA, 5mM succinic acid, and 0.1% fatty  
431 acid free bovine serum albumin, pH 7.4). Oxygen consumption rate was recorded at 37° C for 10 min  
432 and normalized for protein concentration.

### 433 **RNA-seq data expression quantification and functional enrichment analysis**

434 The quality of the single-end reads was evaluated with *FastQC* v.0.11.5  
435 (<https://www.bioinformatics.babraham.ac.uk/projects/fastqc/>). All the *fastqc* files were filtered to  
436 remove low quality reads and adapters with *Trimmomatic* v.0.36 (Bolger et al., 2014). The resulting  
437 reads were mapped to the *Mus musculus* genome (GRCm38) with *HISAT2* v.2.1.0 (Kim et al., 2015)  
438 using default parameters, while *Stringtie* v1.3.4d (Pertea et al., 2015) was applied to the BAM files  
439 obtained with *HISAT2* to generate expression estimates and to quantify the transcript abundance as  
440 transcripts per kilobase per million of mapped reads (TPM). The count matrices generated by  
441 *Stringtie* were imported in *R* where differential expression analysis was performed using the *Deseq2*  
442 package (Love et al., 2014) to compare the two different conditions. The functional annotation was  
443 performed through the *AnnotationDbi* R library  
444 (<http://bioconductor.org/packages/release/bioc/html/AnnotationDbi.html>).

445 Differential expressed genes were selected with threshold of  $\text{Log}_2\text{FC} > 0.58$  ( $p < 0.05$ ). Functional  
446 enrichment analysis including GO and Kyoto Encyclopedia of Genes and Genomes (KEGG) pathway  
447 was performed by using the ClueGo plugin of the Cytoscape v3.7.1. ClueGo settings were:  
448 enrichment only, Benjamini-Hochberg false discovery rate (FDR) correction, GO Term Restriction  
449 Level 3-8 and 3 genes/4% minimum, GO Term Connection (Kappa) minimum 0.4, GO Term  
450 Grouping was on, with an initial group size of 3 and Group Merging set at 50%. Only pathway with  
451  $pV < 0.05$  were shown. Funrich v3.0 tool (<http://funrich.org/index.html>) with default settings was  
452 alternatively used for functional enrichment analyses.

453

### 454 **Real time PCR**

455 Total RNA was extracted using TRI Reagent® (Sigma-Aldrich). RNA (3  $\mu\text{g}$ ) was retro-transcribed  
456 by using M-MLV (Promega, Madison, WI). qPCR was performed in triplicate by using validated  
457 qPCR primers (BLAST), Applied Biosystems™ *Power™* SYBR™ Green Master Mix, and the  
458 QuantStudio3 Real-Time PCR System (Thermo Fisher, Whaltam, MA, USA) as previously described

459 (Aquilano et al., 2016). mRNA levels were normalized to actin mRNA, and the relative mRNA levels  
460 were determined through the  $2^{-\Delta\Delta Ct}$  method.

461

## 462 **Immunoblotting**

463 Tissues or cells were lysed in RIPA buffer (50 mM Tris-HCl, pH 8.0, 150 mM NaCl, 12 mM  
464 deoxycholic acid, 0.5% Nonidet P-40, and protease and phosphatase inhibitors). Five  $\mu$ g proteins  
465 were loaded on SDS-PAGE and subjected to Western blotting. Nitrocellulose membranes were  
466 incubated with anti-HSL (4107, Cell Signalling Technology), anti-p-HSL660 (4126T, Cell Signalling  
467 Technology), anti-p-HSL565 (4137P, Cell Signalling Technology), anti-UCP1 (CS-14670S, Cell  
468 Signalling Technology) anti-p-PKA substrates (9621S , Cell Signalling Technology), anti-FXN (sc-  
469 25820, Santa Cruz Biotechnology), anti-Nrf2 (sc-722, Santa Cruz Biotechnology), anti-PPAR $\gamma$  (sc-  
470 7196, Santa Cruz Biotechnology), anti-Tomm20 (sc-11415, Santa Cruz Biotechnology), anti-Vdac1  
471 (sc-8828, Santa Cruz Biotechnology), anti-Tubulin (T9026, Sigma-Aldrich) primary antibodies at  
472 1:1000 dilution. Successively, membranes were incubated with the appropriate horseradish  
473 peroxidase-conjugated secondary antibodies. Immunoreactive bands were detected by a FluorChem  
474 FC3 System (Protein-Simple, San Jose, CA, USA) after incubation of the membranes with ECL  
475 Selected Western Blotting Detection Reagent (GE Healthcare, Pittsburgh, PA, USA). Densitometric  
476 analyses of the immunoreactive bands were performed by the FluorChem FC3 Analysis Software.

477

## 478 **Statistical analysis**

479 The results are presented as means  $\pm$  S.D. Statistical analyses were carried out by using the Student's  
480 *t* test to compare the means of two groups. One-way ANOVA followed by Tukey's test was used for  
481 comparing the means of more than two groups. Differences were considered to be significant at  
482  $p < 0.05$ .

483

484

485

486 **REFERENCES**

- 487 Abeti, R., Baccaro, A., Esteras, N., and Giunti, P. (2018). Novel Nrf2-Inducer Prevents Mitochondrial  
488 Defects and Oxidative Stress in Friedreich's Ataxia Models. *Front Cell Neurosci* 12, 188.
- 489 Abrahao, A., Pedroso, J.L., Braga-Neto, P., Bor-Seng-Shu, E., De Carvalho Aguiar, P., and  
490 Barsottini, O.G. (2015). Milestones in Friedreich ataxia: more than a century and still learning.  
491 *Neurogenetics* 16, 151-160.
- 492 Adams-Huet, B., Devaraj, S., Siegel, D., and Jialal, I. (2014). Increased adipose tissue insulin  
493 resistance in metabolic syndrome: relationship to circulating adipokines. *Metab Syndr Relat*  
494 *Disord* 12, 503-507.
- 495 Al-Massadi, O., Porteiro, B., Kuhlow, D., Kohler, M., Gonzalez-Rellan, M.J., Garcia-Lavandeira,  
496 M., Diaz-Rodriguez, E., Quinones, M., Senra, A., Alvarez, C.V., Lopez, M., Dieguez, C.,  
497 Schulz, T.J., and Nogueiras, R. (2016). Pharmacological and Genetic Manipulation of p53 in  
498 Brown Fat at Adult But Not Embryonic Stages Regulates Thermogenesis and Body Weight  
499 in Male Mice. *Endocrinology* 157, 2735-2749.
- 500 Aquilano, K., Baldelli, S., La Barbera, L., Lettieri Barbato, D., Tatulli, G., and Ciriolo, M.R. (2016).  
501 Adipose triglyceride lipase decrement affects skeletal muscle homeostasis during aging  
502 through FAs-PPARalpha-PGC-1alpha antioxidant response. *Oncotarget* 7, 23019-23032.
- 503 Aune, U.L., Ruiz, L., and Kajimura, S. (2013). Isolation and differentiation of stromal vascular cells  
504 to beige/brite cells. *J Vis Exp*.
- 505 Baldelli, S., Lettieri Barbato, D., Tatulli, G., Aquilano, K., and Ciriolo, M.R. (2014). The role of  
506 nNOS and PGC-1alpha in skeletal muscle cells. *J Cell Sci* 127, 4813-4820.
- 507 Bartelt, A., Bruns, O.T., Reimer, R., Hohenberg, H., Ittrich, H., Peldschus, K., Kaul, M.G.,  
508 Tromsdorf, U.I., Weller, H., Waurisch, C., Eychmuller, A., Gordts, P.L., Rinninger, F.,  
509 Bruegelmann, K., Freund, B., Nielsen, P., Merkel, M., and Heeren, J. (2011). Brown adipose  
510 tissue activity controls triglyceride clearance. *Nat Med* 17, 200-205.
- 511 Birerdinc, A., Jarrar, M., Stotish, T., Randhawa, M., and Baranova, A. (2013). Manipulating  
512 molecular switches in brown adipocytes and their precursors: a therapeutic potential. *Prog*  
513 *Lipid Res* 52, 51-61.
- 514 Blondin, D.P., Frisch, F., Phoenix, S., Guerin, B., Turcotte, E.E., Haman, F., Richard, D., and  
515 Carpentier, A.C. (2017). Inhibition of Intracellular Triglyceride Lipolysis Suppresses Cold-  
516 Induced Brown Adipose Tissue Metabolism and Increases Shivering in Humans. *Cell Metab*  
517 25, 438-447.
- 518 Bolger, A.M., Lohse, M., and Usadel, B. (2014). Trimmomatic: a flexible trimmer for Illumina  
519 sequence data. *Bioinformatics* 30, 2114-2120.
- 520 Cannon, B., and Nedergaard, J. (2004). Brown adipose tissue: function and physiological  
521 significance. *Physiol Rev* 84, 277-359.
- 522 Chondronikola, M., Volpi, E., Borsheim, E., Porter, C., Annamalai, P., Enerback, S., Lidell, M.E.,  
523 Saraf, M.K., Labbe, S.M., Hurren, N.M., Yfanti, C., Chao, T., Andersen, C.R., Cesani, F.,  
524 Hawkins, H., and Sidossis, L.S. (2014). Brown adipose tissue improves whole-body glucose  
525 homeostasis and insulin sensitivity in humans. *Diabetes* 63, 4089-4099.
- 526 Chondronikola, M., Volpi, E., Borsheim, E., Porter, C., Saraf, M.K., Annamalai, P., Yfanti, C., Chao,  
527 T., Wong, D., Shinoda, K., Labbe, S.M., Hurren, N.M., Cesani, F., Kajimura, S., and Sidossis,  
528 L.S. (2016). Brown Adipose Tissue Activation Is Linked to Distinct Systemic Effects on Lipid  
529 Metabolism in Humans. *Cell Metab* 23, 1200-1206.
- 530 Cnop, M., Igoillo-Esteve, M., Rai, M., Begu, A., Serroukh, Y., Depondt, C., Musuaya, A.E.,  
531 Marhfour, I., Ladiere, L., Moles Lopez, X., Lefkaditis, D., Moore, F., Brion, J.P., Cooper,  
532 J.M., Schapira, A.H., Clark, A., Koeppen, A.H., Marchetti, P., Pandolfo, M., Eizirik, D.L.,  
533 and Fery, F. (2012). Central role and mechanisms of beta-cell dysfunction and death in  
534 friedreich ataxia-associated diabetes. *Ann Neurol* 72, 971-982.
- 535 Cnop, M., Mulder, H., and Igoillo-Esteve, M. (2013). Diabetes in Friedreich ataxia. *J Neurochem* 126  
536 Suppl 1, 94-102.

- 537 Coppola, G., Marmolino, D., Lu, D., Wang, Q., Cnop, M., Rai, M., Acquaviva, F., Coccozza, S.,  
538 Pandolfo, M., and Geschwind, D.H. (2009). Functional genomic analysis of frataxin  
539 deficiency reveals tissue-specific alterations and identifies the PPARgamma pathway as a  
540 therapeutic target in Friedreich's ataxia. *Hum Mol Genet* 18, 2452-2461.
- 541 Cotticelli, M.G., Xia, S., Lin, D., Lee, T., Terrab, L., Wipf, P., Huryn, D.M., and Wilson, R.B. (2019).  
542 Ferroptosis as a Novel Therapeutic Target for Friedreich's Ataxia. *J Pharmacol Exp Ther* 369,  
543 47-54.
- 544 David, J.A., Rifkin, W.J., Rabbani, P.S., and Ceradini, D.J. (2017). The Nrf2/Keap1/ARE Pathway  
545 and Oxidative Stress as a Therapeutic Target in Type II Diabetes Mellitus. *J Diabetes Res*  
546 2017, 4826724.
- 547 Dixon, S.J., Lemberg, K.M., Lamprecht, M.R., Skouta, R., Zaitsev, E.M., Gleason, C.E., Patel, D.N.,  
548 Bauer, A.J., Cantley, A.M., Yang, W.S., Morrison, B., 3rd, and Stockwell, B.R. (2012).  
549 Ferroptosis: an iron-dependent form of nonapoptotic cell death. *Cell* 149, 1060-1072.
- 550 Dodson, M., Castro-Portuguez, R., and Zhang, D.D. (2019). NRF2 plays a critical role in mitigating  
551 lipid peroxidation and ferroptosis. *Redox Biol*, 101107.
- 552 Doh, K.O., Kim, Y.W., Park, S.Y., Lee, S.K., Park, J.S., and Kim, J.Y. (2005). Interrelation between  
553 long-chain fatty acid oxidation rate and carnitine palmitoyltransferase 1 activity with different  
554 isoforms in rat tissues. *Life Sci* 77, 435-443.
- 555 Entringer, S., Rasmussen, J., Cooper, D.M., Ikenoue, S., Waffarn, F., Wadhwa, P.D., and Buss, C.  
556 (2017). Association between supraclavicular brown adipose tissue composition at birth and  
557 adiposity gain from birth to 6 months of age. *Pediatr Res* 82, 1017-1021.
- 558 Esteras, N., Dinkova-Kostova, A.T., and Abramov, A.Y. (2016). Nrf2 activation in the treatment of  
559 neurodegenerative diseases: a focus on its role in mitochondrial bioenergetics and function.  
560 *Biol Chem* 397, 383-400.
- 561 Faraonio, R., Vergara, P., Marzo, D.D., Napolitano, M., Russo, T., and Cimino, F. (2006).  
562 Transcription regulation in NIH3T3 cell clones resistant to diethylmaleate-induced oxidative  
563 stress and apoptosis. *Antioxid Redox Signal* 8, 365-374.
- 564 Finucane, F.M., Luan, J., Wareham, N.J., Sharp, S.J., O'rahilly, S., Balkau, B., Flyvbjerg, A., Walker,  
565 M., Hojlund, K., Nolan, J.J., and Savage, D.B. (2009). Correlation of the leptin:adiponectin  
566 ratio with measures of insulin resistance in non-diabetic individuals. *Diabetologia* 52, 2345-  
567 2349.
- 568 Flachs, P., Rossmeisl, M., Kuda, O., and Kopecky, J. (2013). Stimulation of mitochondrial oxidative  
569 capacity in white fat independent of UCP1: a key to lean phenotype. *Biochim Biophys Acta*  
570 1831, 986-1003.
- 571 Francisco, V., Pino, J., Campos-Cabaleiro, V., Ruiz-Fernandez, C., Mera, A., Gonzalez-Gay, M.A.,  
572 Gomez, R., and Gualillo, O. (2018). Obesity, Fat Mass and Immune System: Role for Leptin.  
573 *Front Physiol* 9, 640.
- 574 Fromme, T., Kleigrewe, K., Dunkel, A., Retzler, A., Li, Y., Maurer, S., Fischer, N., Diezko, R.,  
575 Kanzleiter, T., Hirschberg, V., Hofmann, T., and Klingenspor, M. (2018). Degradation of  
576 brown adipocyte purine nucleotides regulates uncoupling protein 1 activity. *Mol Metab* 8, 77-  
577 85.
- 578 Grahn, T.H., Zhang, Y., Lee, M.J., Sommer, A.G., Mostoslavsky, G., Fried, S.K., Greenberg, A.S.,  
579 and Puri, V. (2013). FSP27 and PLIN1 interaction promotes the formation of large lipid  
580 droplets in human adipocytes. *Biochem Biophys Res Commun* 432, 296-301.
- 581 Hankir, M.K., and Klingenspor, M. (2018). Brown adipocyte glucose metabolism: a heated subject.  
582 *EMBO Rep*.
- 583 Hou, Y., Xue, P., Bai, Y., Liu, D., Woods, C.G., Yarborough, K., Fu, J., Zhang, Q., Sun, G., Collins,  
584 S., Chan, J.Y., Yamamoto, M., Andersen, M.E., and Pi, J. (2012). Nuclear factor erythroid-  
585 derived factor 2-related factor 2 regulates transcription of CCAAT/enhancer-binding protein  
586 beta during adipogenesis. *Free Radic Biol Med* 52, 462-472.

- 587 Isaacs, C.J., Brigatti, K.W., Kucheruk, O., Ratcliffe, S., Sciascia, T., McCormack, S.E., Willi, S.M.,  
588 and Lynch, D.R. (2016). Effects of genetic severity on glucose homeostasis in Friedreich  
589 ataxia. *Muscle Nerve* 54, 887-894.
- 590 Kim, D., Langmead, B., and Salzberg, S.L. (2015). HISAT: a fast spliced aligner with low memory  
591 requirements. *Nat Methods* 12, 357-360.
- 592 Koeppen, A.H., Davis, A.N., and Morral, J.A. (2011). The cerebellar component of Friedreich's  
593 ataxia. *Acta Neuropathol* 122, 323-330.
- 594 Koeppen, A.H., and Mazurkiewicz, J.E. (2013). Friedreich ataxia: neuropathology revised. *J*  
595 *Neuropathol Exp Neurol* 72, 78-90.
- 596 Koeppen, A.H., Ramirez, R.L., Becker, A.B., Bjork, S.T., Levi, S., Santambrogio, P., Parsons, P.J.,  
597 Kruger, P.C., Yang, K.X., Feustel, P.J., and Mazurkiewicz, J.E. (2015). The pathogenesis of  
598 cardiomyopathy in Friedreich ataxia. *PLoS One* 10, e0116396.
- 599 Lettieri Barbato, D., Tatulli, G., Vegliante, R., Cannata, S.M., Bernardini, S., Ciriolo, M.R., and  
600 Aquilano, K. (2015). Dietary fat overload reprograms brown fat mitochondria. *Front Physiol*  
601 6, 272.
- 602 Lettieri-Barbato, D., Cannata, S.M., Casagrande, V., Ciriolo, M.R., and Aquilano, K. (2018). Time-  
603 controlled fasting prevents aging-like mitochondrial changes induced by persistent dietary fat  
604 overload in skeletal muscle. *PLoS One* 13, e0195912.
- 605 Lettieri-Barbato, D., D'angelo, F., Sciarretta, F., Tatulli, G., Tortolici, F., Ciriolo, M.R., and Aquilano,  
606 K. (2017). Maternal high calorie diet induces mitochondrial dysfunction and senescence  
607 phenotype in subcutaneous fat of newborn mice. *Oncotarget* 8, 83407-83418.
- 608 Li, Y., Ding, L., Hassan, W., Abdelkader, D., and Shang, J. (2013). Adipokines and hepatic insulin  
609 resistance. *J Diabetes Res* 2013, 170532.
- 610 Liang, X., Yang, Q., Zhang, L., Maricelli, J.W., Rodgers, B.D., Zhu, M.J., and Du, M. (2016).  
611 Maternal high-fat diet during lactation impairs thermogenic function of brown adipose tissue  
612 in offspring mice. *Sci Rep* 6, 34345.
- 613 Lidell, M.E. (2019). Brown Adipose Tissue in Human Infants. *Handb Exp Pharmacol* 251, 107-123.
- 614 Love, M.I., Huber, W., and Anders, S. (2014). Moderated estimation of fold change and dispersion  
615 for RNA-seq data with DESeq2. *Genome Biol* 15, 550.
- 616 Maio, N., and Rouault, T.A. (2015). Iron-sulfur cluster biogenesis in mammalian cells: New insights  
617 into the molecular mechanisms of cluster delivery. *Biochim Biophys Acta* 1853, 1493-1512.
- 618 Martelli, A., Friedman, L.S., Reutenauer, L., Messaddeq, N., Perlman, S.L., Lynch, D.R., Fedosov,  
619 K., Schulz, J.B., Pandolfo, M., and Puccio, H. (2012). Clinical data and characterization of  
620 the liver conditional mouse model exclude neoplasia as a non-neurological manifestation  
621 associated with Friedreich's ataxia. *Dis Model Mech* 5, 860-869.
- 622 McMackin, M.Z., Henderson, C.K., and Cortopassi, G.A. (2017). Neurobehavioral deficits in the  
623 KIKO mouse model of Friedreich's ataxia. *Behav Brain Res* 316, 183-188.
- 624 Molchadsky, A., Ezra, O., Amendola, P.G., Krantz, D., Kogan-Sakin, I., Buganim, Y., Rivlin, N.,  
625 Goldfinger, N., Folgiero, V., Falcioni, R., Sarig, R., and Rotter, V. (2013). p53 is required for  
626 brown adipogenic differentiation and has a protective role against diet-induced obesity. *Cell*  
627 *Death Differ* 20, 774-783.
- 628 Nakae, J., Cao, Y., Oki, M., Orba, Y., Sawa, H., Kiyonari, H., Iskandar, K., Suga, K., Lombes, M.,  
629 and Hayashi, Y. (2008). Forkhead transcription factor FoxO1 in adipose tissue regulates  
630 energy storage and expenditure. *Diabetes* 57, 563-576.
- 631 Navarro, J.A., Ohmann, E., Sanchez, D., Botella, J.A., Liebisch, G., Molto, M.D., Ganfornina, M.D.,  
632 Schmitz, G., and Schneuwly, S. (2010). Altered lipid metabolism in a Drosophila model of  
633 Friedreich's ataxia. *Hum Mol Genet* 19, 2828-2840.
- 634 Nedergaard, J., Bengtsson, T., and Cannon, B. (2011). New powers of brown fat: fighting the  
635 metabolic syndrome. *Cell Metab* 13, 238-240.

- 636 Obis, E., Irazusta, V., Sanchis, D., Ros, J., and Tamarit, J. (2014). Frataxin deficiency in neonatal rat  
637 ventricular myocytes targets mitochondria and lipid metabolism. *Free Radic Biol Med* 73, 21-  
638 33.
- 639 Perteau, M., Perteau, G.M., Antonescu, C.M., Chang, T.C., Mendell, J.T., and Salzberg, S.L. (2015).  
640 StringTie enables improved reconstruction of a transcriptome from RNA-seq reads. *Nat*  
641 *Biotechnol* 33, 290-295.
- 642 Petrillo, S., Piermarini, E., Pastore, A., Vasco, G., Schirinzi, T., Carrozzo, R., Bertini, E., and  
643 Piemonte, F. (2017). Nrf2-Inducers Counteract Neurodegeneration in Frataxin-Silenced  
644 Motor Neurons: Disclosing New Therapeutic Targets for Friedreich's Ataxia. *Int J Mol Sci*  
645 18.
- 646 Pi, J., Leung, L., Xue, P., Wang, W., Hou, Y., Liu, D., Yehuda-Shnaidman, E., Lee, C., Lau, J., Kurtz,  
647 T.W., and Chan, J.Y. (2010). Deficiency in the nuclear factor E2-related factor-2 transcription  
648 factor results in impaired adipogenesis and protects against diet-induced obesity. *J Biol Chem*  
649 285, 9292-9300.
- 650 Puccio, H., Simon, D., Cossee, M., Criqui-Filipe, P., Tiziano, F., Melki, J., Hindelang, C., Matyas,  
651 R., Rustin, P., and Koenig, M. (2001). Mouse models for Friedreich ataxia exhibit  
652 cardiomyopathy, sensory nerve defect and Fe-S enzyme deficiency followed by  
653 intramitochondrial iron deposits. *Nat Genet* 27, 181-186.
- 654 Raman, S.V., Phatak, K., Hoyle, J.C., Pennell, M.L., Mccarthy, B., Tran, T., Prior, T.W., Olesik,  
655 J.W., Lutton, A., Rankin, C., Kissel, J.T., and Al-Dahhak, R. (2011). Impaired myocardial  
656 perfusion reserve and fibrosis in Friedreich ataxia: a mitochondrial cardiomyopathy with  
657 metabolic syndrome. *Eur Heart J* 32, 561-567.
- 658 Rim, J.S., Xue, B., Gawronska-Kozak, B., and Kozak, L.P. (2004). Sequestration of thermogenic  
659 transcription factors in the cytoplasm during development of brown adipose tissue. *J Biol*  
660 *Chem* 279, 25916-25926.
- 661 Sacks, H., and Symonds, M.E. (2013). Anatomical locations of human brown adipose tissue:  
662 functional relevance and implications in obesity and type 2 diabetes. *Diabetes* 62, 1783-1790.
- 663 Sahdeo, S., Scott, B.D., McMackin, M.Z., Jasoliya, M., Brown, B., Wulff, H., Perlman, S.L., Pook,  
664 M.A., and Cortopassi, G.A. (2014). Dyclonine rescues frataxin deficiency in animal models  
665 and buccal cells of patients with Friedreich's ataxia. *Hum Mol Genet* 23, 6848-6862.
- 666 Shan, Y., Schoenfeld, R.A., Hayashi, G., Napoli, E., Akiyama, T., Iodi Carstens, M., Carstens, E.E.,  
667 Pook, M.A., and Cortopassi, G.A. (2013). Frataxin deficiency leads to defects in expression  
668 of antioxidants and Nrf2 expression in dorsal root ganglia of the Friedreich's ataxia YG8R  
669 mouse model. *Antioxid Redox Signal* 19, 1481-1493.
- 670 Sidossis, L., and Kajimura, S. (2015). Brown and beige fat in humans: thermogenic adipocytes that  
671 control energy and glucose homeostasis. *J Clin Invest* 125, 478-486.
- 672 Stockwell, B.R., Friedmann Angeli, J.P., Bayir, H., Bush, A.I., Conrad, M., Dixon, S.J., Fulda, S.,  
673 Gascon, S., Hatzios, S.K., Kagan, V.E., Noel, K., Jiang, X., Linkermann, A., Murphy, M.E.,  
674 Overholtzer, M., Oyagi, A., Pagnussat, G.C., Park, J., Ran, Q., Rosenfeld, C.S., Salnikow, K.,  
675 Tang, D., Torti, F.M., Torti, S.V., Toyokuni, S., Woerpel, K.A., and Zhang, D.D. (2017).  
676 Ferroptosis: A Regulated Cell Death Nexus Linking Metabolism, Redox Biology, and  
677 Disease. *Cell* 171, 273-285.
- 678 Stram, A.R., Wagner, G.R., Fogler, B.D., Pride, P.M., Hirschey, M.D., and Payne, R.M. (2017).  
679 Progressive mitochondrial protein lysine acetylation and heart failure in a model of  
680 Friedreich's ataxia cardiomyopathy. *PLoS One* 12, e0178354.
- 681 Sutak, R., Xu, X., Whitnall, M., Kashem, M.A., Vyoral, D., and Richardson, D.R. (2008). Proteomic  
682 analysis of hearts from frataxin knockout mice: marked rearrangement of energy metabolism,  
683 a response to cellular stress and altered expression of proteins involved in cell structure,  
684 motility and metabolism. *Proteomics* 8, 1731-1741.
- 685 Tamarit, J., Obis, E., and Ros, J. (2016). Oxidative stress and altered lipid metabolism in Friedreich  
686 ataxia. *Free Radic Biol Med* 100, 138-146.



687 Townsend, K.L., and Tseng, Y.H. (2014). Brown fat fuel utilization and thermogenesis. *Trends*  
688 *Endocrinol Metab* 25, 168-177.

689

## 690 **ACKNOWLEDGEMENTS**

691 This work was supported by Friedreich Ataxia Research Alliance (General Research Grant 2017-  
692 2018) to K.A., National Ataxia Foundation (Seed Money Grant 2016) to K.A and European  
693 Foundation for the Study of Diabetes (EFSD/Lilly\_2017) to D.L.B.

694

## 695 **CONFLICT OF INTEREST**

696 Authors declare no conflict of interest.

697

## 698 **AUTHOR CONTRIBUTIONS**

699 K.A. conceptualized and designed the study, wrote the manuscript

700 D.L.B. analyzed and interpreted the data, wrote the manuscript

701 R.T., designed and supervised the in vivo experiments and performed research

702 G.G., V.C., L.D.A., R.B. performed in vivo experiments and collected results

703 F.T., performed in vitro experiments

704 F.I., M.F. performed computational analyses

705 S.C., M.Fr. performed immunohistochemistry experiments and optical microscopy analyses;

706 S.C., M.Z. performed electron microscopy experiments and analyses.

707 S.R., S.M., M.M., M.F., R.F. contributed in interpreting the data and in planning the research.

708

709

710

711

712 **FIGURES AND FIGURE LEGENDS**

713

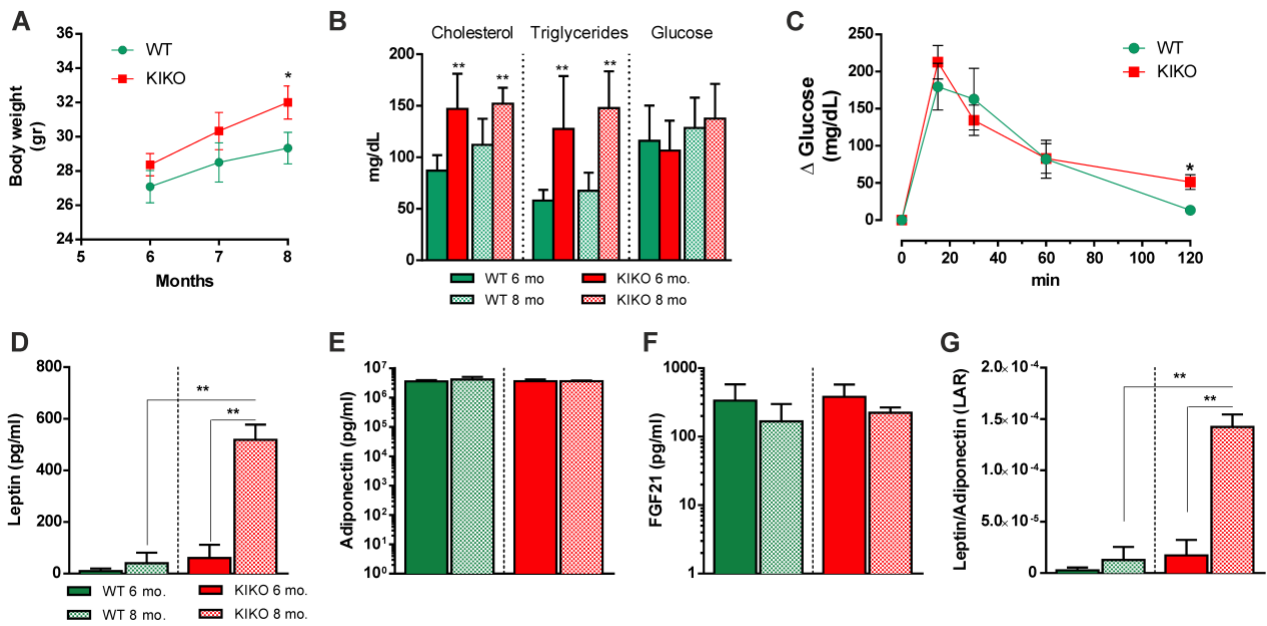

714

715

716 **Fig. 1. Bio-clinical and adipokine analyses revealed dyslipidemia and insulin resistance in KIKO**  
 717 **mice.**

718 (A) Body weight recorded at different ages (n=12 each group; \*p<0.05 vs age-matched WT mice).

719 (B) Bio-clinical analyses of fasting glycaemia and lipidemia (triglycerides and cholesterol) carried  
 720 out at different ages (n=12 each group; \*\*p<0.001 vs age-matched WT mice).

721 (C) Oral glucose tolerance test (OGTT) carried out in 8-months old mice (n=6 each group; \*p<0.05  
 722 vs WT mice).

723 (D-G) Serum levels of leptin (D), adiponectin (E), FGF21 (F) and leptin to adiponectin ratio (G)  
 724 determined in mice at different ages (n=6 each group; \*\*p<0.01).

725

726

727

728

729

730

731

732

733

734

735

736

737

738

739

740

741

742

743

744  
745  
746

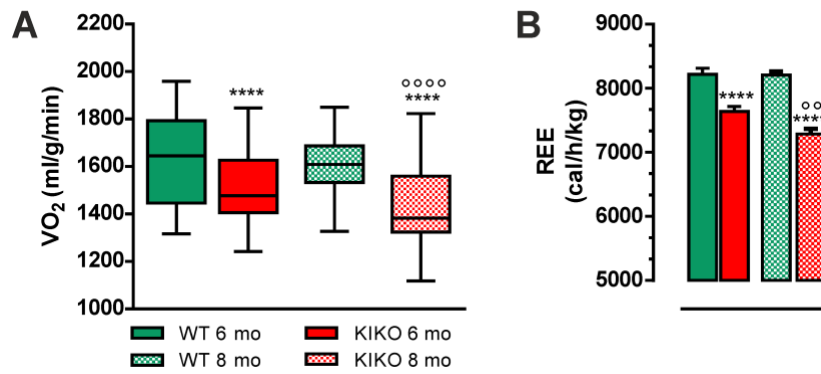

747

748

749 **Fig. 2. Indirect calorimetry indicated decreased oxygen consumption and energy expenditure in**  
750 **KIKO mice.**

751 (A, B) Oxygen consumption (VO<sub>2</sub>) (A) and resting energy expenditure (REE) (B) measured by  
752 indirect calorimetry at different ages (n=12; each group; \*\*\*\*p<0.0001 vs age-matched WT mice,  
753 °°°°p<0.0001, °°p<0.01 vs 6-months KIKO mice).

754

755

756

757

758

759

760

761

762

763

764

765

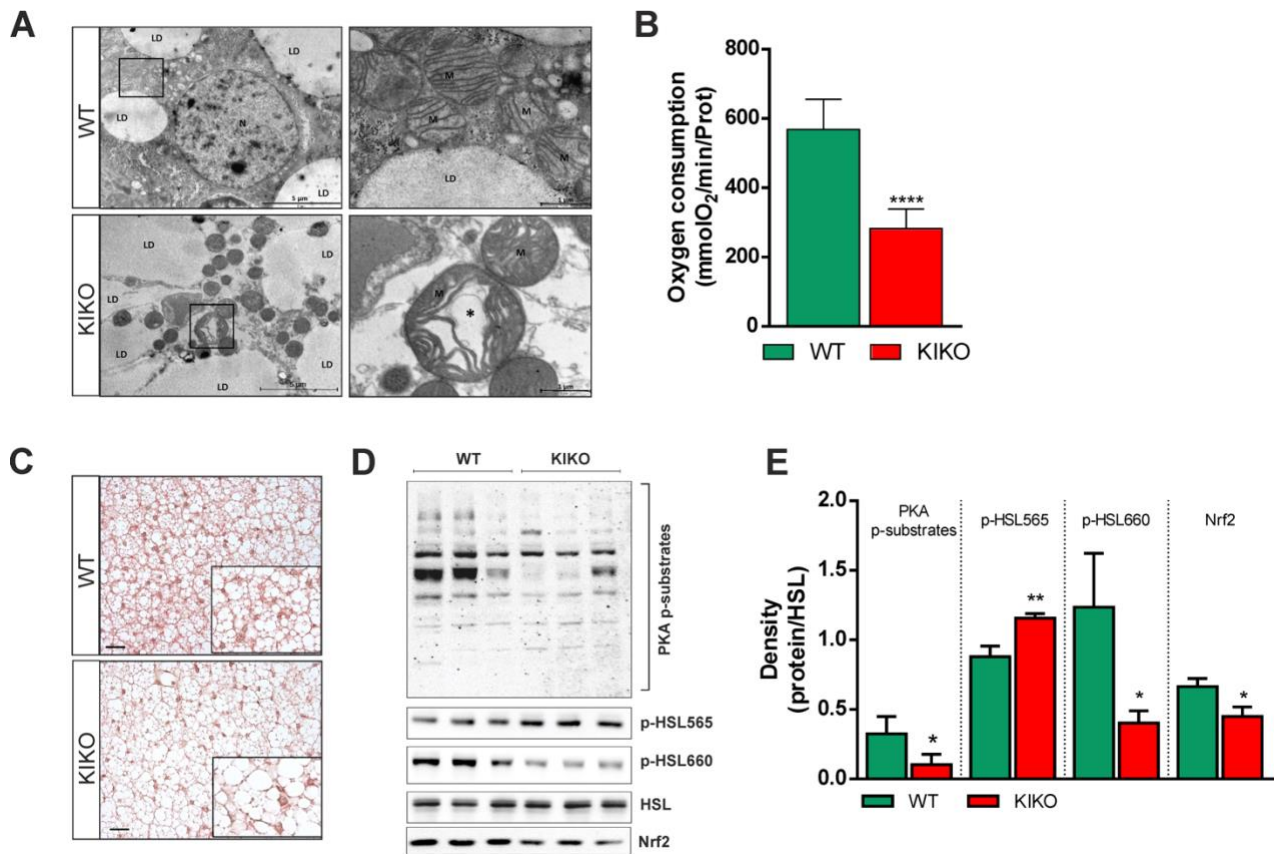

766  
767  
768  
769  
770  
771  
772  
773  
774  
775  
776  
777  
778  
779  
780  
781  
782  
783  
784  
785  
786  
787  
788  
789  
790  
791  
792  
793  
794

**Fig. 3. Mitochondria of KIKO mice show altered mitochondrial morphology and respiratory function.**

(A) Representative transmission electron microscopy pictures of BAT from 6-months old WT and KIKO mice are reported in *left panels* (5800x). Images with high power field (18500x) are reported in *right panels*. A representative mitochondrion of KIKO mice with altered ultrastructure was evidenced with an asterisks (\*). LD, lipid droplets; N, nucleus; M, mitochondria.

(B) Oxygen consumption determined through a polarographic method on crude mitochondria isolated from BAT of 6-months old mice (n=6 each group; \*\*\*\*p<0.0001 vs WT).

(C) Representative BAT histology images after staining with H&E (n=3 each group). Scale bars, 25  $\mu$ m.

(D, E) Representative immunoblots (D) of total HSL, phospho-active (p-HSL660) and phospho-inactive HSL (p-HSL565), PKA phosphorylated substrates (PKA p-substrates) and Nrf2 in total BAT homogenates, and densitometric analyses of the immunoreactive bands (E). HSL was used as loading control (n=6 each group, \*p<0.05, \*\*p<0.01 vs WT).

795  
796  
797  
798

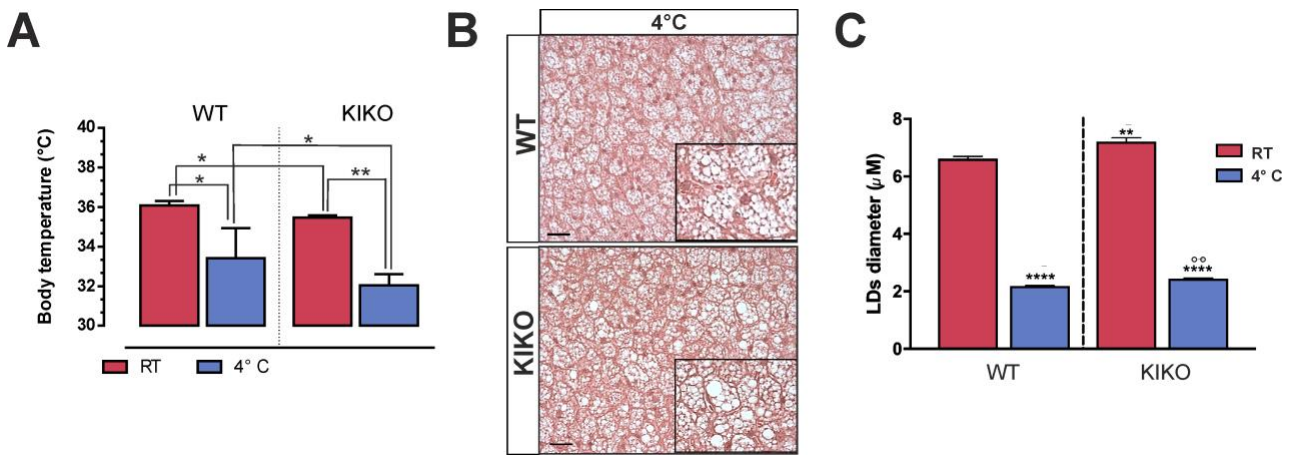

799  
800  
801  
802  
803  
804  
805  
806  
807  
808  
809  
810  
811  
812  
813  
814

**Fig. 4. KIKO mice have reduced cold tolerance.**

(A) Body temperature measured in 6-months old mice after 12 h cold exposure (n=6 each group; \*p<0.05, \*\*p<0.01).

(B) Representative histology images of BAT from mice exposed to cold after staining with H&E (n=3 each group). Scale bars, 25 μm.

(C) Lipid droplets (LDs) diameter measurement in three fields for each BAT histology through ImageJ (300 droplets total at least for each sample). BAT of WT and KIKO mice at RT (see Fig. 4C) or exposed to cold (B) for 12 h were analyzed (n=3, \*\*\*\*p<0.0001 vs RT, \*\*p<0.001 vs WT mice at RT, °°p<0.001 vs WT mice at 4°C).

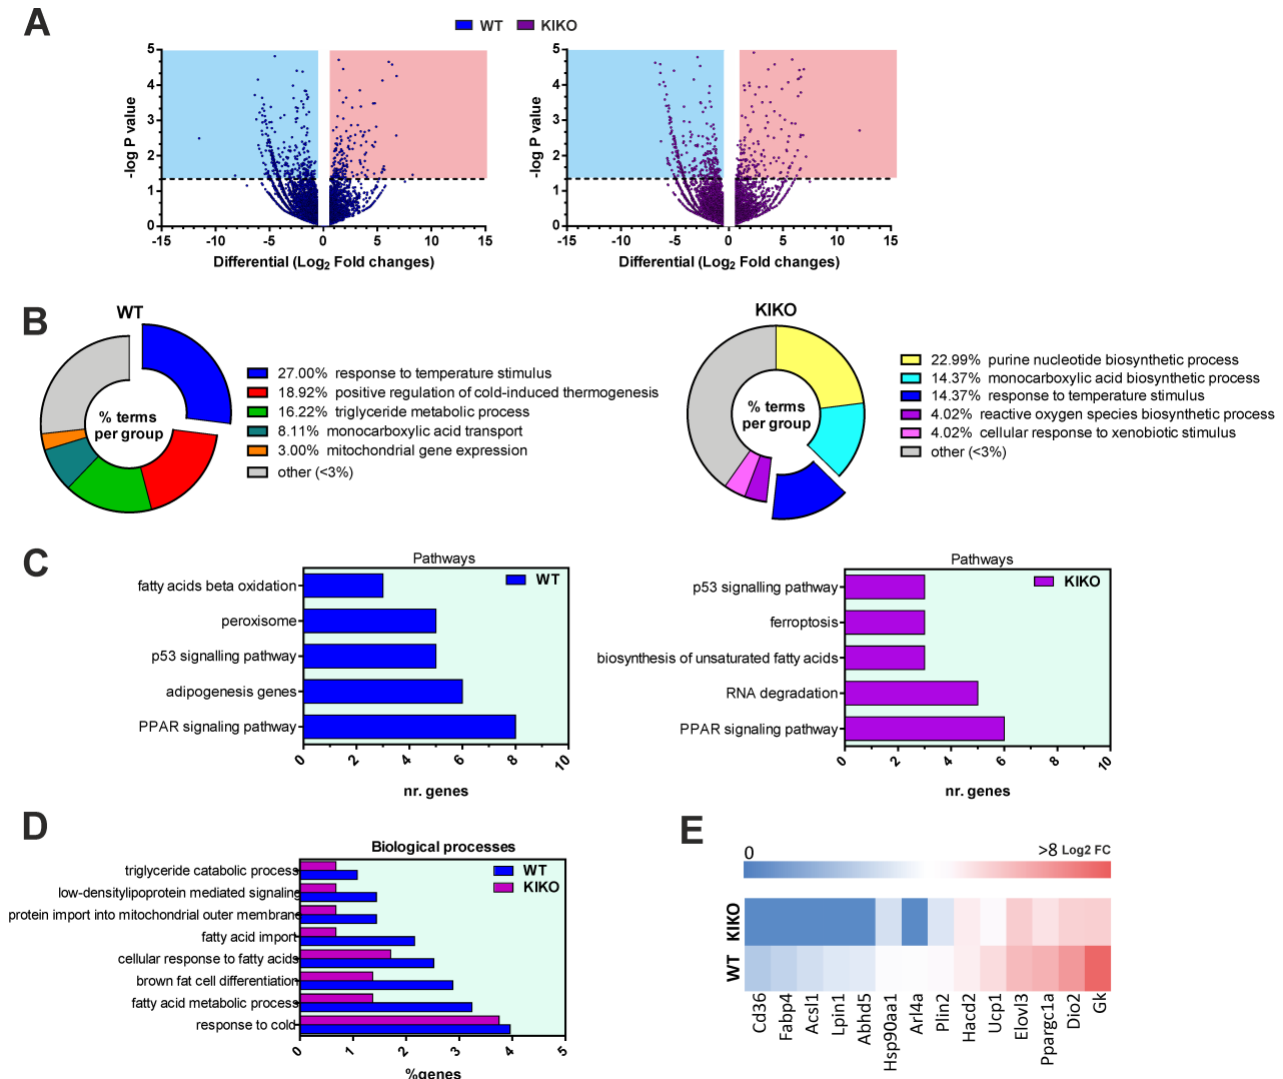

815  
816

**Fig. 5. RNAseq analysis revealed reduced expression of genes related to BAT activity in KIKO mice.**

819 (A) Volcano plot representation of differential gene expression analysis in BAT of 6-months old WT  
820 (*upper panel*) and KIKO mice (*lower panel*) exposed to cold for 12 h. Light blue and red squares  
821 mark the genes with significantly decreased or increased expression respectively ( $p < 0.05$ ,  $n = 3$ ).  
822 (B, C) Biological processes (B), KEGG and Wiki pathways (C) significantly up-regulated in BAT of  
823 WT (*left panels*) and KIKO mice (*right panels*) upon cold exposure determined through ClueGo  
824 plugin of Cytoscape v3.7 platform (Benjamini-corrected  $p$  values  $< 0.05$ ).  
825 (D) Comparative analysis of significantly up-regulated biological processes ( $p < 0.05$ ) in WT mice and  
826 KIKO mice determined through Funrich v3.0.  
827 (E) Heatmap showing representative genes significantly up-regulated ( $p < 0.05$ ) in WT mice compared  
828 to KIKO mice.  
829

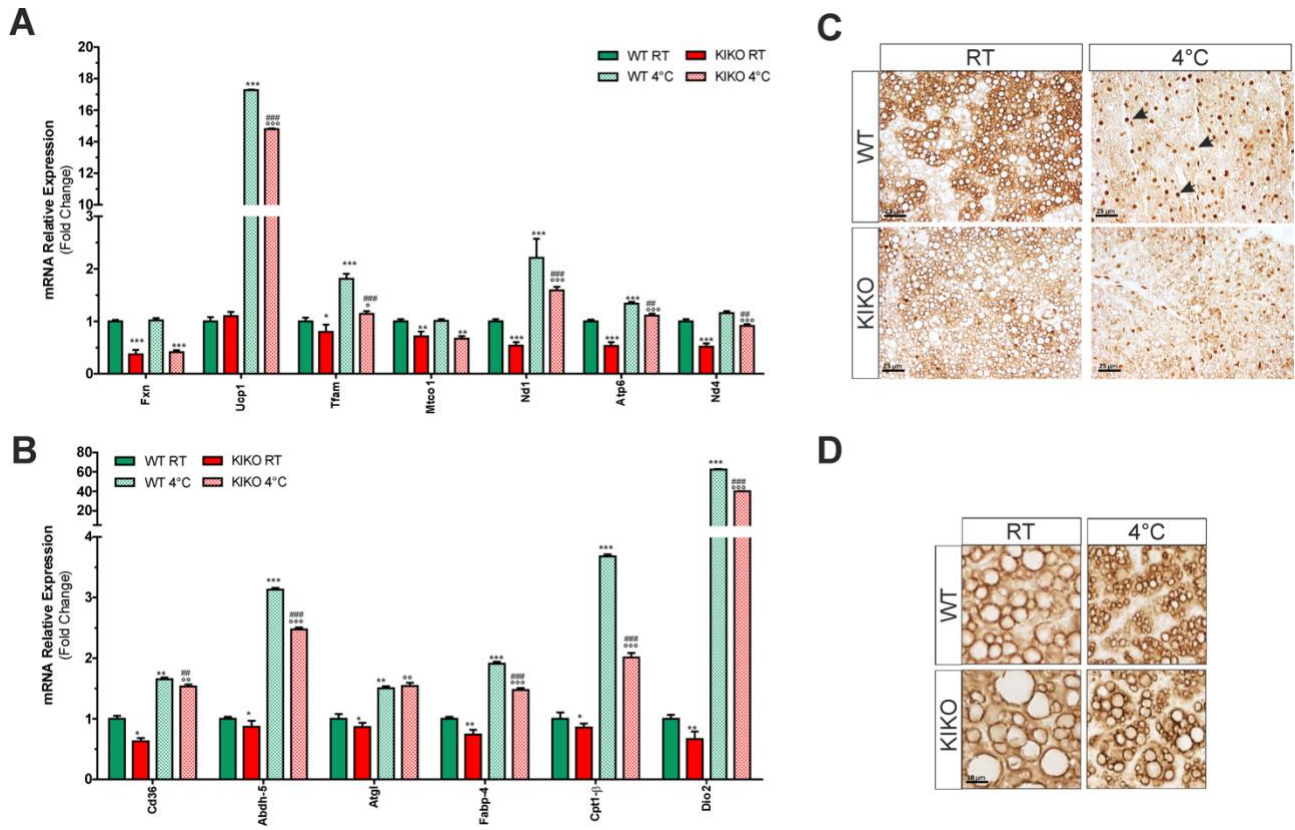

830  
831

832 **Fig. 6. The expression of genes related to mitochondrial respiration, thermogenesis and lipolytic**  
833 **pathways are altered in BAT of KIKO mice.**

834 (A, B) RT-qPCR analysis of mitochondrial genes (A) and genes related to lipid metabolism (B) in  
835 BAT of 6-months old mice (n=6; \*p<0.05, \*\*p<0.01, \*\*\*p<0.001 vs WT; °p<0.05, °°p<0.01,  
836 °°°p<0.001 vs KIKO; ###p<0.01, ###°p<0.001 vs WT at 4°C).

837 (C, D) Representative immunohistochemical analyses of phospho-PKA substrates (C) and perilipin-  
838 1 (D) (n=3 mice each group). Black arrows (C) indicate some nuclei showing positivity to the  
839 immunostaining of phospho-PKA substrates.

840  
841  
842  
843

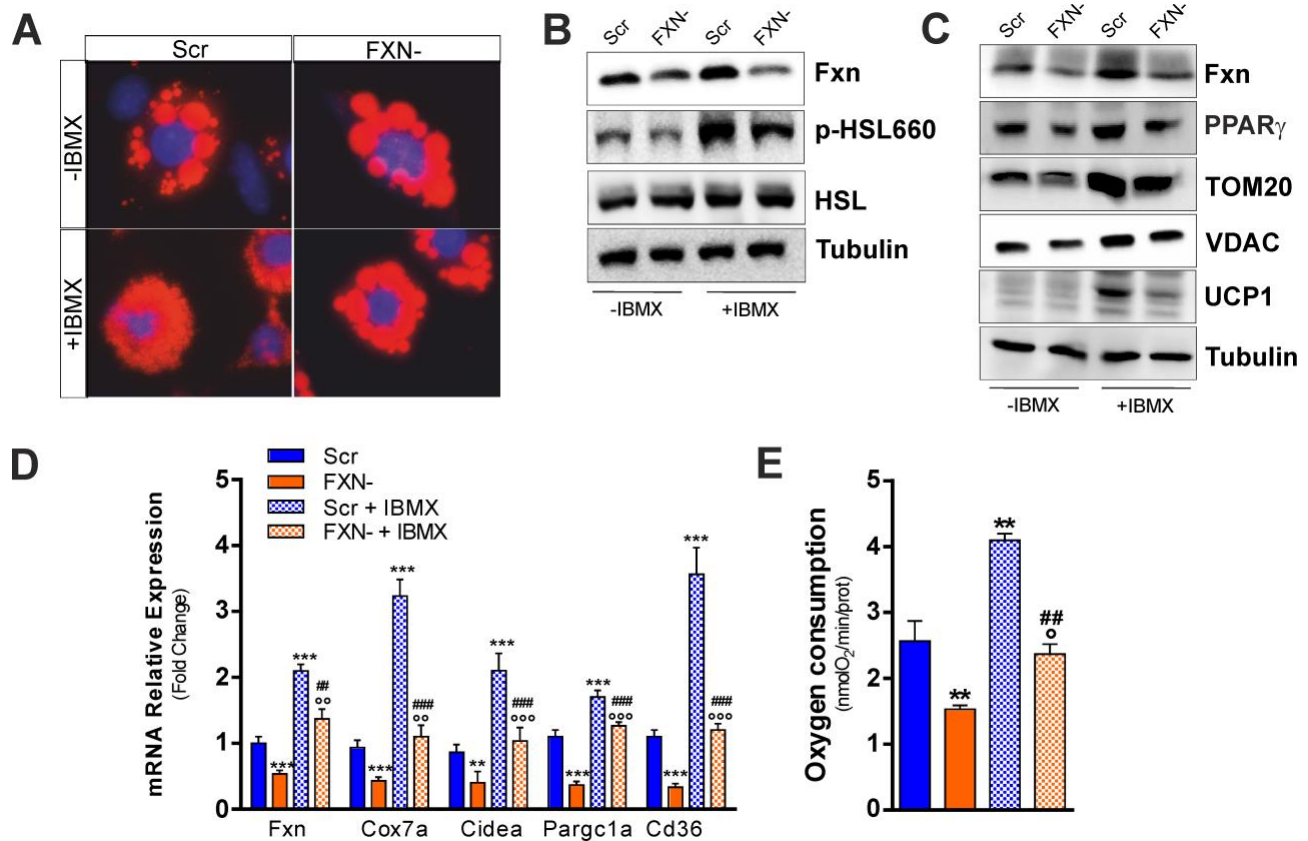

844  
845  
846  
847  
848  
849  
850  
851  
852  
853  
854  
855  
856  
857

**Fig. 7. FXN deficiency impairs thermogenic program also in a brown adipocytes cell line.**

(A) Representative immunofluorescence analysis of lipid droplets after staining with the neutral lipid probe Nile Red in T37i brown adipocytes transfected with a pool of siRNAs targeting FXN mRNA (FXN-) or with a pool of Scr siRNAs (Scr) (n=4).

(B, C) Representative immunoblots of FXN, total and phospho-active HSL (p-HSL660) (B), PPAR $\gamma$ , TOM20, VDAC and UCP1 (C) (n=4).

(D) RT-qPCR analysis of genes implicated in thermogenesis (n=4; \*\*p<0.01, \*\*\*p<0.001 vs Scr; °°p<0.01, °°°p<0.001 vs FXN-; ###p<0.01, ####p<0.001 vs Scr + IBMX).

(E) Cellular oxygen consumption determined through a polarographic method (n=4, \*\*p<0.01 vs Scr, °p<0.05 vs FXN-; ###p<0.001 vs Scr + IBMX).



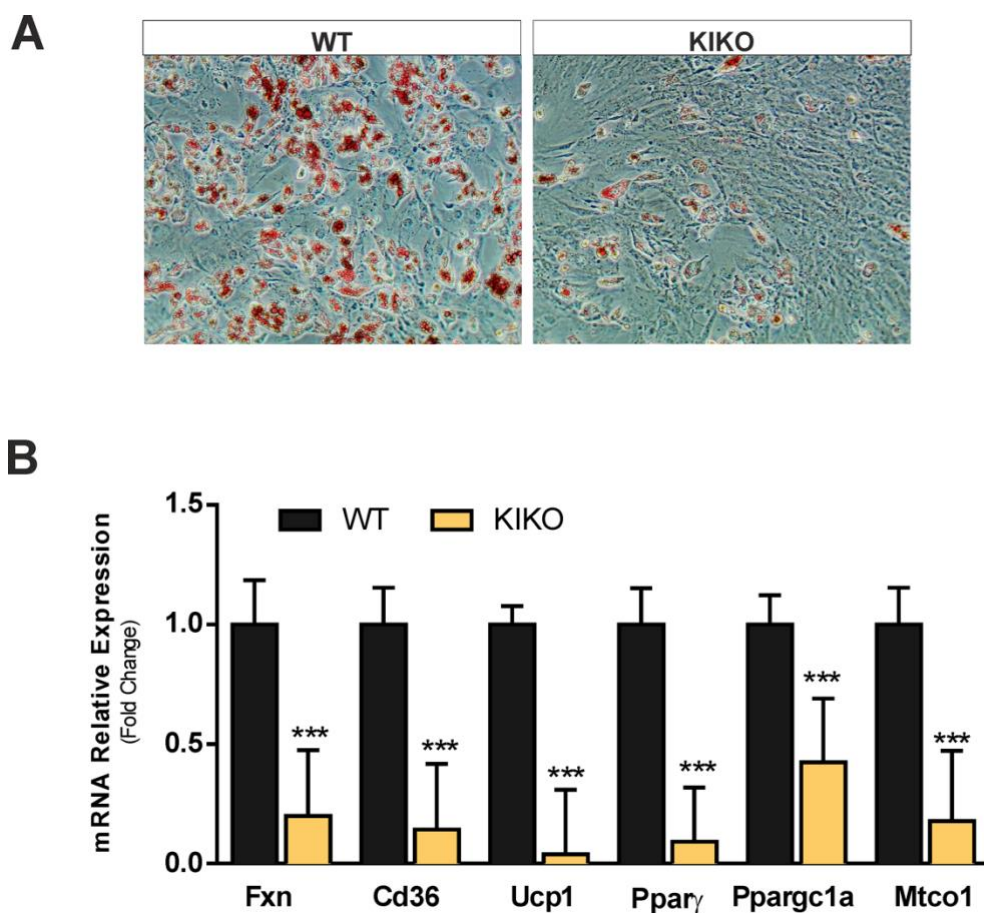

858  
859  
860  
861  
862  
863  
864  
865  
866  
867  
868

**Fig. 8. KIKO mice show affected adipogenic potential.**

(A) Representative images of stromal vascular cells (SVCs) obtained from mouse adipose depots of WT or KIKO mice, differentiated in adipocytes and stained with Oil Red O to detect lipid droplet-containing mature adipocytes (n = 3).

(B) RT-qPCR analysis of genes implicated in adipogenesis and thermogenesis in SVCs differentiated in adipocytes (n = 6; \*\*\*p < 0.001 vs WT).
